# Supplementary material for: Sutureless Purely Off-Clamp Robot-Assisted Partial Nephrectomy: Avoiding Renorrhaphy Does Not Jeopardize Surgical and Functional Outcomes
Source: MDPI journal article supplement (doi:10.3390/cancers15030698), 2023-01-23
Supplement: s1 [file s1]

**Table S1:** baseline characteristics and outcomes of patients intraoperatively converted from SL to RR ocRAPN

| <b>Intraoperatively converted<br/>from SL to RR<br/>n=10</b> |                  |
|--------------------------------------------------------------|------------------|
| Age, yrs                                                     | 56 (51-70)       |
| Male gender, n (%)                                           | 8 (80%)          |
| ASA $\geq 3$ , n (%)                                         | 1 (10%)          |
| Baseline eGFR, ml/min                                        | 88.7 (78.5-96.8) |
| Tumor Size, cm                                               | 4.7 (3-6)        |
| cT2, n(%)                                                    | 2 (20%)          |
| RENAL score                                                  |                  |
| $\leq 6$                                                     | 0 (0%)           |
| 7-9                                                          | 6 (60%)          |
| $\geq 10$                                                    | 4 (40%)          |
| LOS, d                                                       | 2 (2-3)          |
| Blood Transfusions, n (%)                                    | 1 (10%)          |
| Postoperative eGFR, ml/min                                   | 71.6 (62.6-79.7) |
| <i>Trifecta</i> , n (%)                                      | 8 (80%)          |
| PSM, n (%)                                                   | 0 (0%)           |
| CD $\geq 3$ complications, n (%)                             | 1 (10%)          |
| sRFD, n (%)                                                  | 1 (10%)          |

SL = sutureless, RR = renorrhaphy, PSM = propensity score matched analysis, ASA = American Society of Anesthesiologists score, eGFR = estimated glomerular filtration rate, LOS = length of stay, PSM = positive surgical margins, CD = Clavien-Dindo grade, sRFD = significant renal function deterioration

**Table S2:** Uni/-multivariable logistic regression analyses to identify predictors of Significant renal function deterioration (sRFD) after ocRAPN.

|              | Univariable <b>Logistic regression</b><br><b>analysis</b> to identify predictors of<br><u>sRFD</u> |             |             |                   | Multivariable <b>Logistic regression</b><br><b>analysis</b> to identify predictors of<br><u>sRFD</u> |             |              |                   |
|--------------|----------------------------------------------------------------------------------------------------|-------------|-------------|-------------------|------------------------------------------------------------------------------------------------------|-------------|--------------|-------------------|
|              | OR                                                                                                 | 95% CI      |             | P                 | OR                                                                                                   | 95% CI      |              | P                 |
|              |                                                                                                    | Lower       | Higher      |                   |                                                                                                      | Lower       | Higher       |                   |
| Age          | <b>0.98</b>                                                                                        | <b>0.96</b> | <b>0.99</b> | <b>0.03</b>       | <b>1.07</b>                                                                                          | <b>1.04</b> | <b>1.11</b>  | <b>&lt; 0.001</b> |
| Male gender  | 1.12                                                                                               | 0.62        | 2.01        | 0.71              | -                                                                                                    | -           | -            | -                 |
| ASA $\geq 3$ | 1.60                                                                                               | 0.86        | 2.95        | 0.13              | -                                                                                                    | -           | -            | -                 |
| Pre-eGFR     | 0.97                                                                                               | 0.97        | 0.98        | <0.001            | 1.66                                                                                                 | 0.76        | 3.65         | 0.78              |
| RENAL score  |                                                                                                    |             |             | <b>&lt; 0.001</b> |                                                                                                      |             |              | <b>&lt; 0.001</b> |
| $\leq 6$     | <b>ref</b>                                                                                         | -           | -           |                   | <b>ref</b>                                                                                           | -           | -            |                   |
| 7-9          | <b>1.58</b>                                                                                        | <b>0.74</b> | <b>3.39</b> | <b>0.24</b>       | <b>1.66</b>                                                                                          | <b>0.76</b> | <b>3.65</b>  | <b>0.21</b>       |
| $\geq 10$    | <b>4.20</b>                                                                                        | <b>1.96</b> | <b>9.01</b> | <b>&lt; 0.001</b> | <b>4.96</b>                                                                                          | <b>2.23</b> | <b>11.06</b> | <b>&lt; 0.001</b> |
| Renorrhaphy  | <b>2.31</b>                                                                                        | <b>1.13</b> | <b>4.71</b> | <b>0.02</b>       | <b>2.35</b>                                                                                          | <b>1.12</b> | <b>4.94</b>  | <b>0.02</b>       |

ASA = American Society of Anesthesiologists score, Pre-eGFR = preoperative estimated glomerular filtration rate
